# Supplementary material for: Whole Exome Analysis to Select Targeted Therapies for Patients with Metastatic Breast Cancer – A Feasibility Study
Source: PubMed Central journal article supplement — Geburtshilfe Frauenheilkd. 2023 Sep 12;83(9):1138–47. doi: 10.1055/a-2150-9440 (PMC10497348; doi:10.1055/a-2150-9440), 2023-09-12
Supplement: 10-1055-a-2150-9440_21513219.pdf [file 10-1055-a-2150-9440_21513219.pdf]

## Supplementary material

**Figure S1:** Study cohort and flowchart (MBC = metastatic breast cancer, WES = whole exome sequencing).

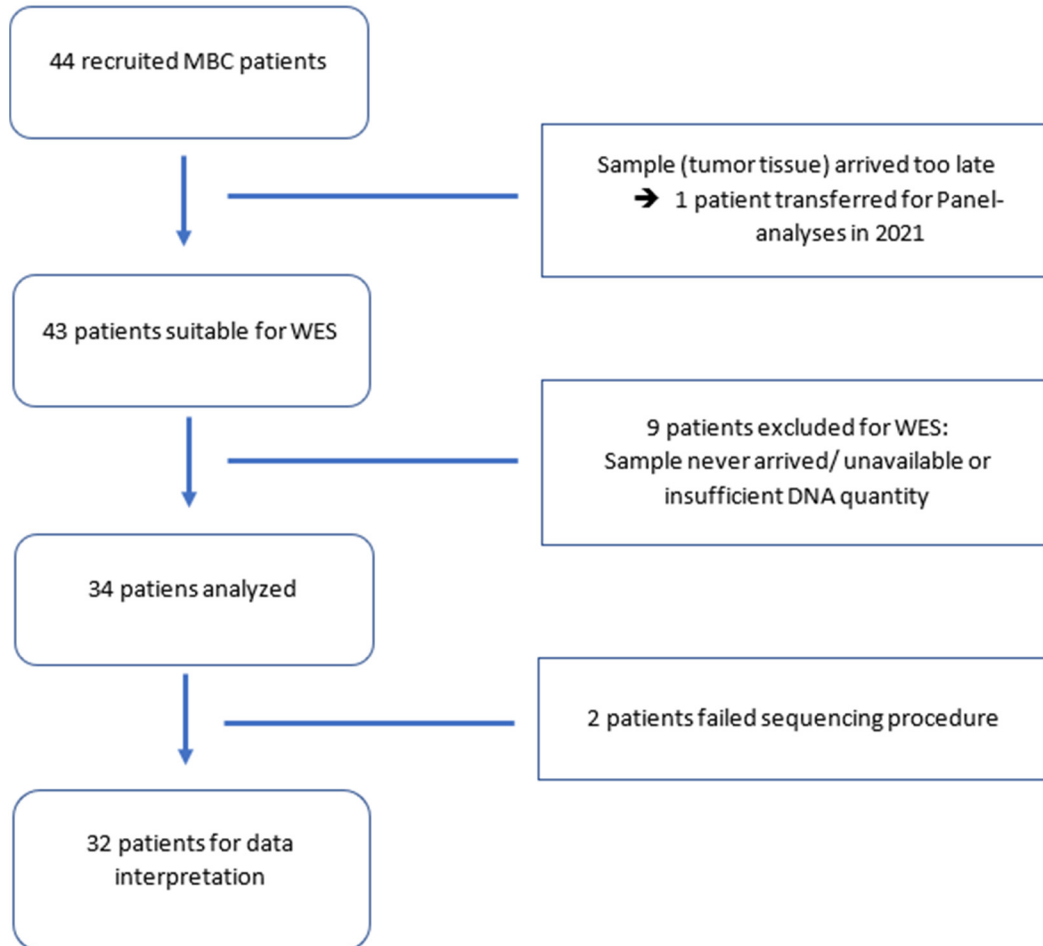

**Table S1:** Patient collective.

| Patient Characteristics | N = 44 |    |
|-------------------------|--------|----|
| BC Subtype              | N      | %  |
| HR+, HER2-              | 26     | 50 |
| HER2+, HR+ or HR-       | 7      | 13 |
| TNBC                    | 10     | 19 |
| missing                 | 1      | 2  |
